# Supplementary material for: Tributyrin, a Butyrate Pro-Drug, Primes Satellite Cells for Differentiation by Altering the Epigenetic Landscape
Source: MDPI journal article supplement (doi:10.3390/cells10123475), 2021-12-09
Supplement: s1 [file s1]

**Table S1.** Primer and probe sequences used for gene expression analysis by quantitative RT-PCR.

| Gene Symbol        | Gene ID   | Primer Sequence 5'-3'                                                                | Probe and Sequence 5'-3'            |
|--------------------|-----------|--------------------------------------------------------------------------------------|-------------------------------------|
| PAX7 <sup>α</sup>  | 100625823 | F: CAGCAAGCCCAGACAGG<br>R: TCGGATCTCCCAGCTGAA                                        | (HEX): TTGAGGAGTACAAGAGGGAGAACCCA   |
| MYOD1 <sup>α</sup> | 407604    | F: CCGACGGCATGATGGATTATAG<br>R: CGACACCGCAGCATTCTT                                   | (FAM): AATAGGTGCCGTCGTAGCAGTTCC     |
| MYOG <sup>α</sup>  | 497618    | F: AGTGAATGCAGTTCCACAG<br>R: AGGTGAGGGAGTGCAGATT                                     | (Texas Red): CAACCCAGGGGATCATCTGCTC |
| RPL4 <sup>α</sup>  | 100038029 | F: TGGTGGTTGAAGATAAAGTTGAAAG<br>R: TGAGAGGCATAAACCTTCTTGAT<br>F: GCGGAAGCGTGTAATCAGA | (Cy5): AACCAAGGAGGCTGTTCTGCTTCT     |
| EZH2 <sup>β</sup>  | 100625497 | R: CCTTCGCTGTTTCCACTCTT                                                              | -----                               |
| RPL4 <sup>β</sup>  | 100038029 | F: CAAGAGTAACTACAACCTTC<br>R: GAACTCTACGATGAATCTTC                                   | -----                               |

α- Multiplex, probe based qRT-PCR; β- Singleplex, SYBR Green qRT-PCR.
